# Supplementary material for: Dysregulation of Gap Junction Function and Cytokine Production in Response to Non-Genotoxic Polycyclic Aromatic Hydrocarbons in an In Vitro Lung Cell Model
Source: Cancers (Basel). 2019 Apr 23;11(4):572. doi: 10.3390/cancers11040572 (PMC6521202; doi:10.3390/cancers11040572)
Supplement: Supplementary file 1 [file cancers-11-00572-s001.pdf]

## Supplementary Materials

# Dysregulation of Gap Junction Function and Cytokine Production in Response to Non-Genotoxic Polycyclic Aromatic Hydrocarbons in an In Vitro Lung Cell Model

Deedee Romo, Kalpana Velmurugan, Brad L. Upham, Lori D. Dwyer-Nield and Alison K. Bauer

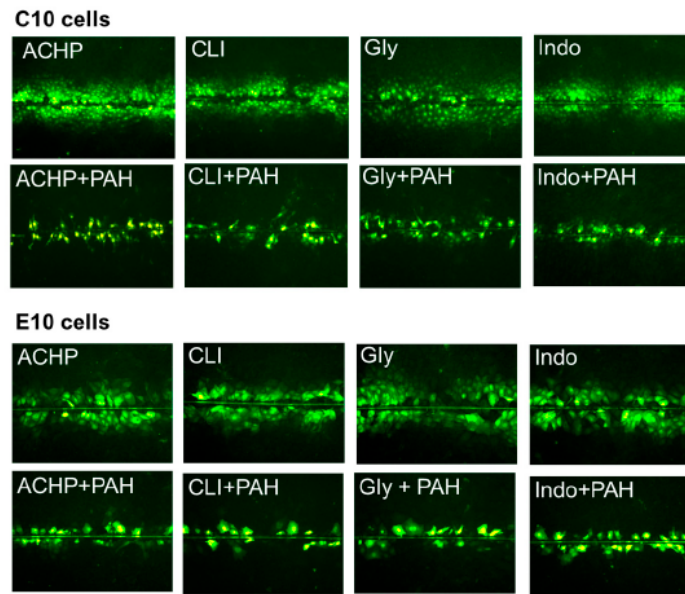

**Figure S1.** Representative images for the other inhibitor combinations with 4 h PAH treatment in C10 and E10 cells. C10 and E10 cells were treated with the binary LMW PAH mixture (40 mM at 4 h; 1:1 ratio of 1-methylanthracene and fluoranthene) for 4 h following 1 h pre-incubation with these inhibitors (ACHP, 1 mM; CLI-095, 3 mM; glyburide, 50 mM; indomethacin, 1 mM). Representative images of C10 and E10 cells following the SL/DT assay used to quantify the gap junction activity in these cells in response to the LMW PAHs and ACHP, CLI-095, or indomethacin combinations. Experiments were repeated 3 times;  $n = 3$  per treatment per experiment. Gly, glyburide; Indo, indomethacin. The control and PAH alone treatments are found in Figure 3.

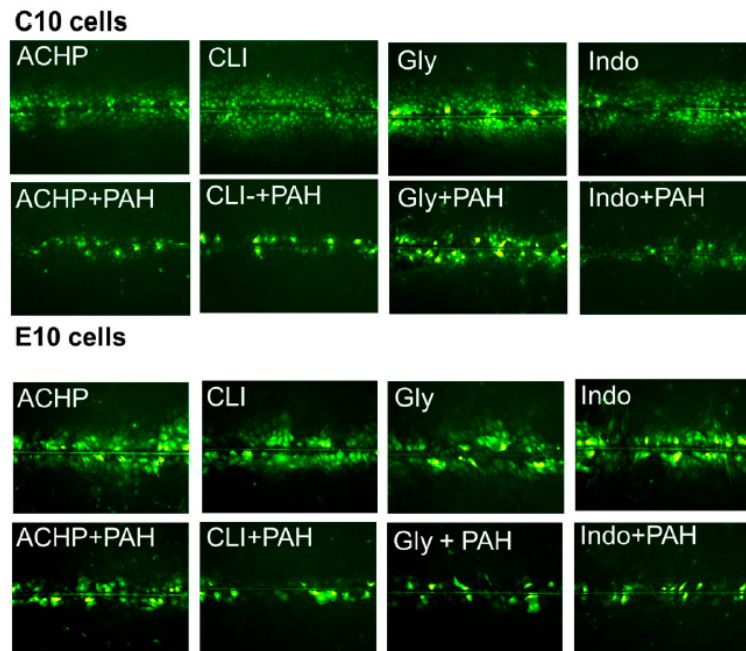

**Figure S2.** Representative images for the other inhibitor combinations with 24 h PAH treatment in C10 and E10 cells. C10 and E10 cells were treated with the binary LMW PAH mixture (15 mM at 24 h; 1:1 ratio of 1-methylanthracene and fluoranthene) following a 1 h pre-incubation with these inhibitors (ACHP, 1 mM; CLI-095, 3 mM; glyburide, 50 mM; indomethacin, 1 mM). Representative images of C10 and E10 cells following the SL/DT assay used to quantify the gap junction activity in these cells in response to the LMW PAHs and all inhibitor combinations, except parthenolide. Experiments were repeated 3 times;  $n = 3$  per treatment per experiment. Gly, glyburide; Indo, indomethacin. The control and PAH alone treatments are found in Figure 4.

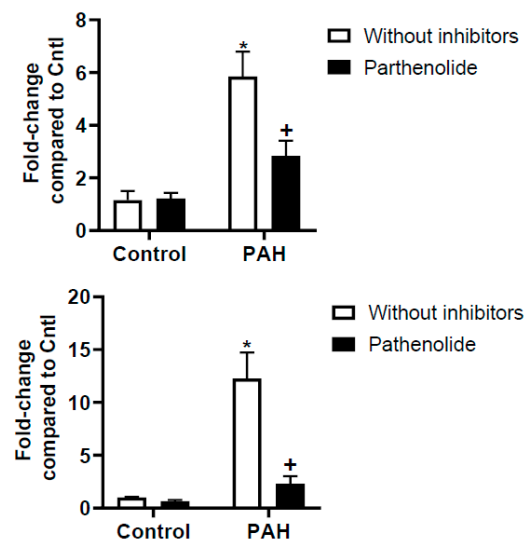

**Figure S3.** *Tnf* transcript expression in C10 and E10 cells is inhibited by parthenolide in the presence of PAH mixture treatment. C10 and E10 cells were treated for 4 h with binary LMW PAH mixture (40 mM; 1:1 ratio of 1-methylanthracene and fluoranthene) following a 1 h pre-incubation with parthenolide (10 mM). qRT-PCR was then performed for TNF, normalized to 18S followed by comparison to control treated cells (DMSO). Experiments were repeated twice with  $n = 3$  per experiment. \*  $p < 0.05$  for treatment compared to control; †  $p < 0.05$  for PTL + PAH compared to PAH treatment.

**Table S1.** Primer sequences for qRTPCR analysis \*.

| Name        |                 | Primer Sequence                   | Genbank<br>Accession/NCBI |
|-------------|-----------------|-----------------------------------|---------------------------|
| Il1 $\beta$ | Forward (5'→3') | CAA CCA ACA AGT GAT ATT CTC CAT G | M15131.1                  |
|             | Reverse (5'→3') | GAT CCA CAC TCT CCA GCT GCA       |                           |
| NALP3       | Forward (5'→3') | CTC TAT CAA GGA CAG GAA CG        | Nm_145827.3               |
|             | Reverse (5'→3') | TAG GAT GGT TTT CCC GAT GC        |                           |
| TLR4        | Forward (5'→3') | ATT GAA GAC AAG GCA TGG CAT       | AF095353                  |
|             | Reverse (5'→3') | GTG AGC CAC ATT GAG TTT CTT       |                           |

\* Kc, Cox-2, Il6, Mcp-1, 18S primers are published in Osgood et al., 2017 [37]; Tnf primers are published in Osgood et al, 2013 [36].

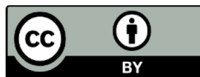

© 2019 by the authors. Licensee MDPI, Basel, Switzerland. This article is an open access article distributed under the terms and conditions of the Creative Commons Attribution (CC BY) license (<http://creativecommons.org/licenses/by/4.0/>).
